# Supplementary material
Source: PubMed Central journal article supplement (PMC6645419)
Supplement: ao8b00862_si_001.pdf [file ao8b00862_si_001.pdf]

# Supporting Information for: Zirconium Modification Promotes Catalytic Activity of a Single-Site Cobalt Heterogeneous Catalyst for Propane Dehydrogenation

Yiqing Zhao,<sup>1,2</sup> Hyuntae Sohn,<sup>2</sup> Bo Hu,<sup>1,2</sup> Jens Niklas,<sup>2</sup> Oleg G. Poluektov,<sup>2</sup> Jun Tian,<sup>3</sup>  
Massimiliano Delferro,<sup>2</sup> Adam S. Hock<sup>1,2\*</sup>

<sup>1</sup>Department of Chemistry, Illinois Institute of Technology, Chicago IL 60616

<sup>2</sup>Chemical Sciences and Engineering Division, Argonne National Laboratory, Lemont IL 60439

<sup>3</sup>Center for Nanoscale Materials, Argonne National Laboratory, Lemont IL 60439

E-mail: [ahock@iit.edu](mailto:ahock@iit.edu)

## Table of Contents

|                                                                                                                                |     |
|--------------------------------------------------------------------------------------------------------------------------------|-----|
| <b>Figure S1.</b> BET and BJH of SiO <sub>2</sub> , Zr/SiO <sub>2</sub> , Co/SiO <sub>2</sub> and Co-Zr/SiO <sub>2</sub> ..... | 2   |
| <b>Figure S2.</b> TEM of Zr/SiO <sub>2</sub> , Co/SiO <sub>2</sub> , Co-Zr/SiO <sub>2</sub> .....                              | 3   |
| <b>Figure S3-S6.</b> XAS for Co/SiO <sub>2</sub> , Co-Zr/SiO <sub>2</sub> as-prepared and cooled .....                         | 4-7 |
| <b>Figure S7.</b> Synthesis and catalytic activity of Co/ZrO <sub>2</sub> .....                                                | 8   |

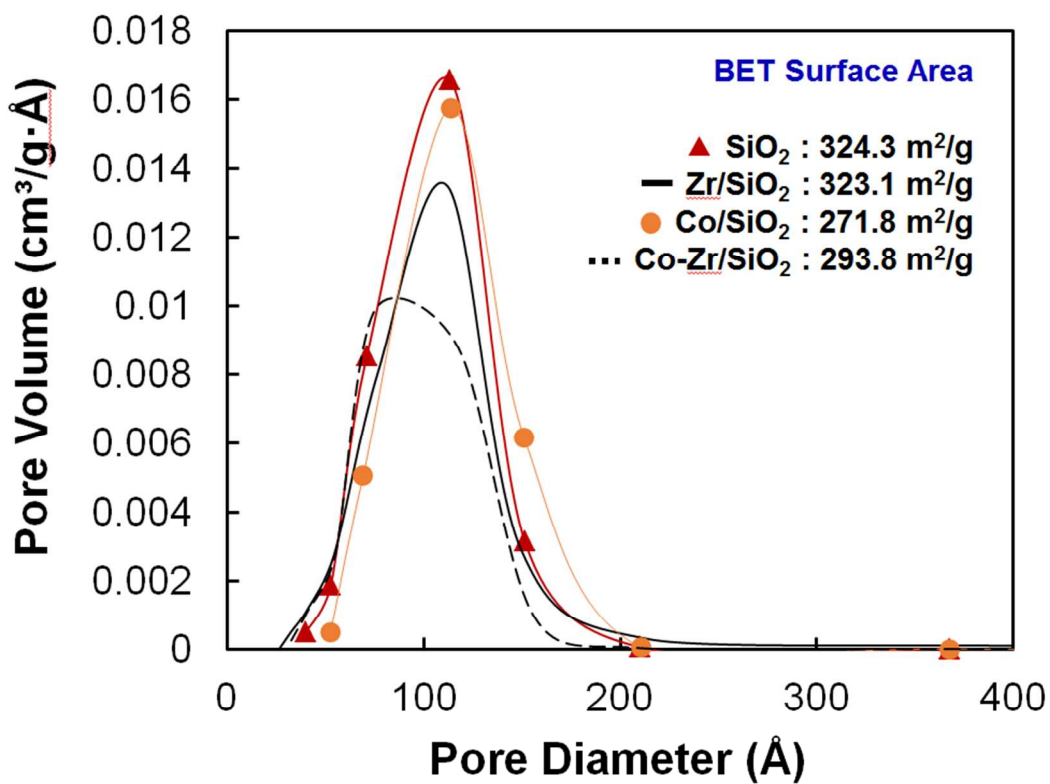

**Figure S1.** BET surface areas and BJH pore size distributions of SiO<sub>2</sub>, Zr/SiO<sub>2</sub>, Co/SiO<sub>2</sub> and Co-Zr/SiO<sub>2</sub>

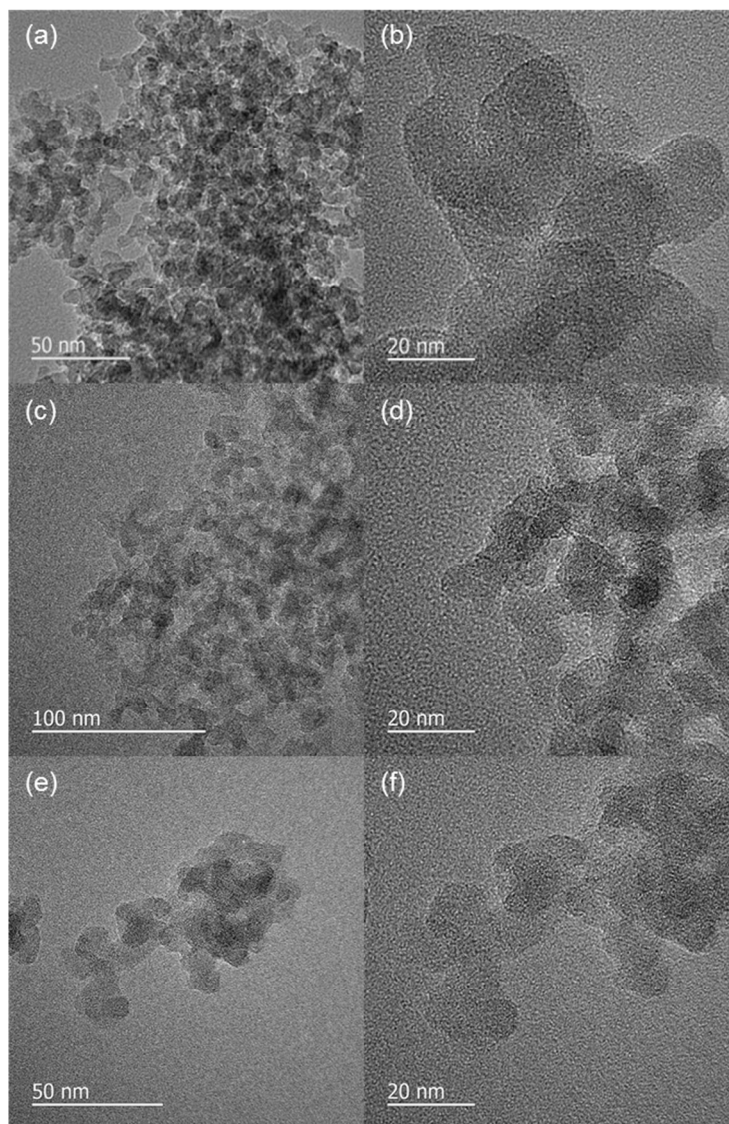

**Figure S2.** TEM images of (a, b) Zr/SiO<sub>2</sub>, (c,d) Co/SiO<sub>2</sub> and (e,f) Co-Zr/SiO<sub>2</sub>

The particle size and morphology of the as-prepared catalyst materials was examined by TEM and are shown in Figure S2. The TEM images were taken at multiple random locations to improve the consistency of the analysis. The images in Figure S2 (a, b) show Zr/SiO<sub>2</sub> support with no large clusters of ZrO<sub>x</sub> from the initial synthesis. Similarly, addition of cobalt onto SiO<sub>2</sub> and Zr/SiO<sub>2</sub> supports retains the well-dispersed surface sites. As it can be seen in Figure S2 (c, d) (e, f) neither the Co/SiO<sub>2</sub> nor the Co-Zr/SiO<sub>2</sub> samples indicate formation of nanoparticles to the limit of the TEM resolution. TEM-EDX analysis also shows well-dispersed Zr and Co.

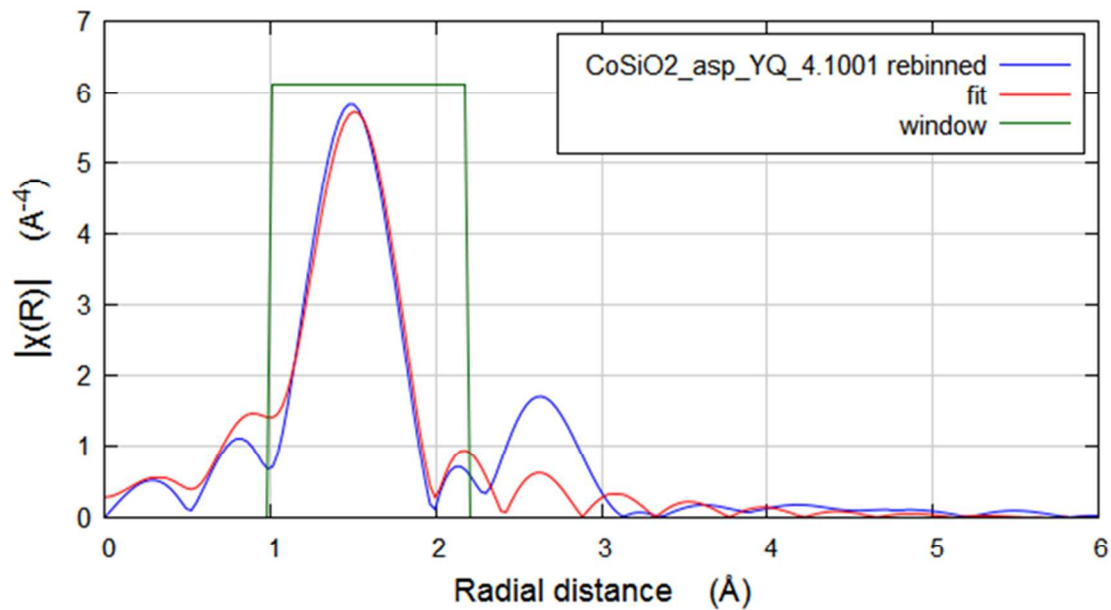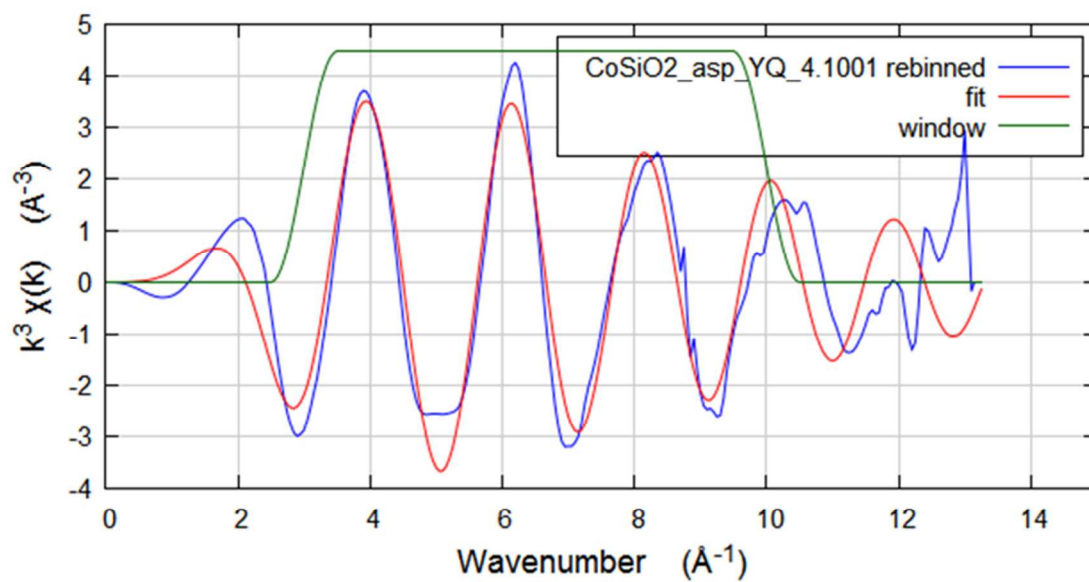

**Figure S3.** EXAFS data and fit for Co/SiO<sub>2</sub> as-prepared in (1)  $R$ -space (top) and (2)  $k$ -space (bottom).

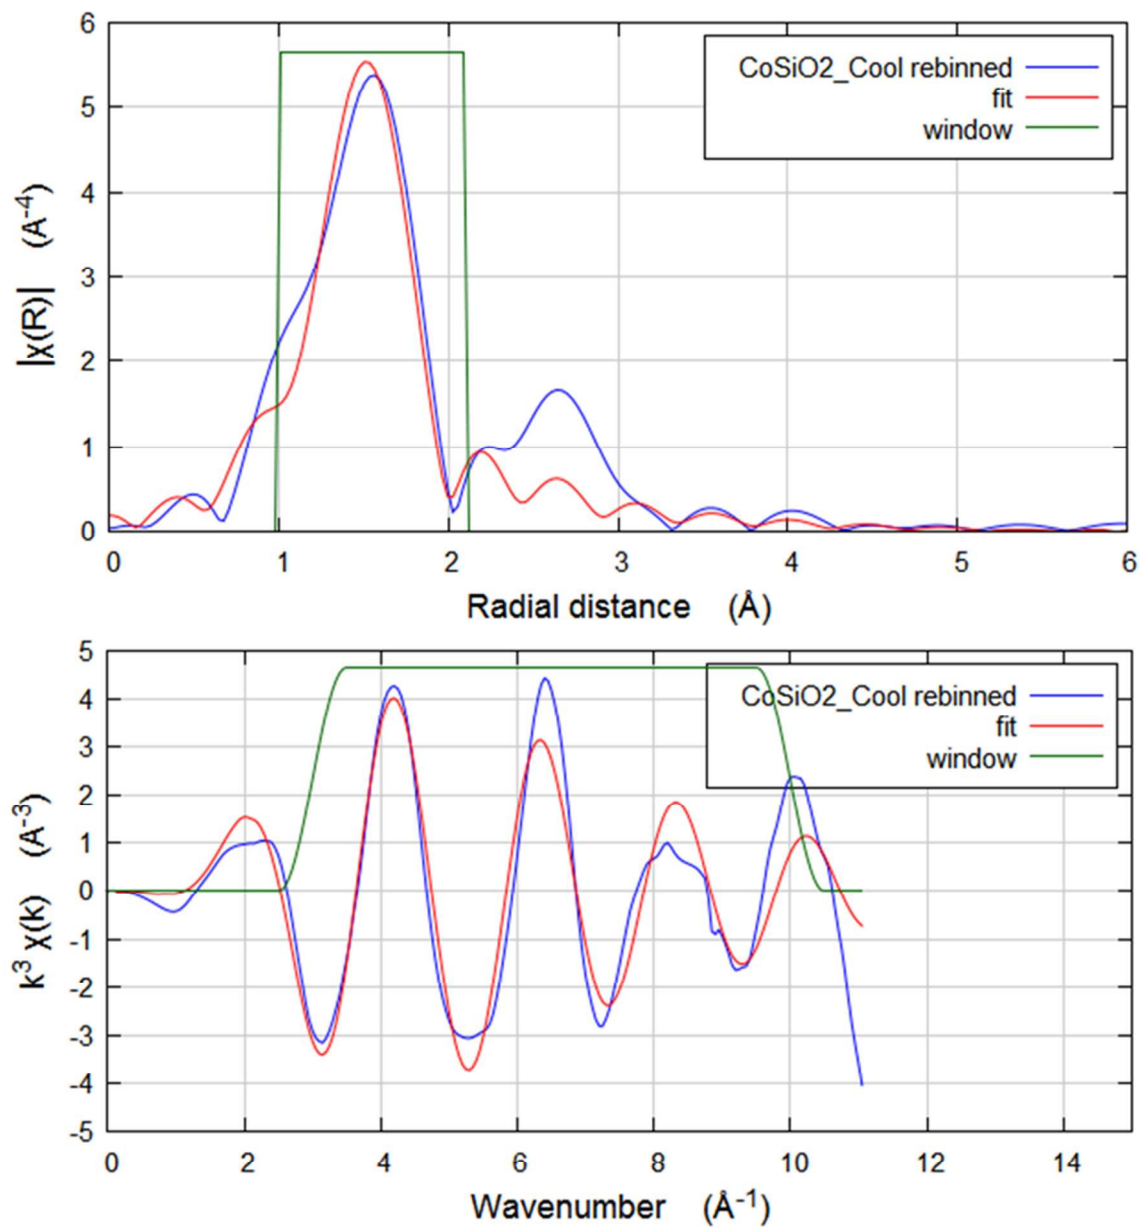

**Figure S4.** EXAFS data and fit for Co/SiO<sub>2</sub> cooled down to room temperature after catalysis in (1)  $R$ -space (top) and (2)  $k$ -space (bottom).

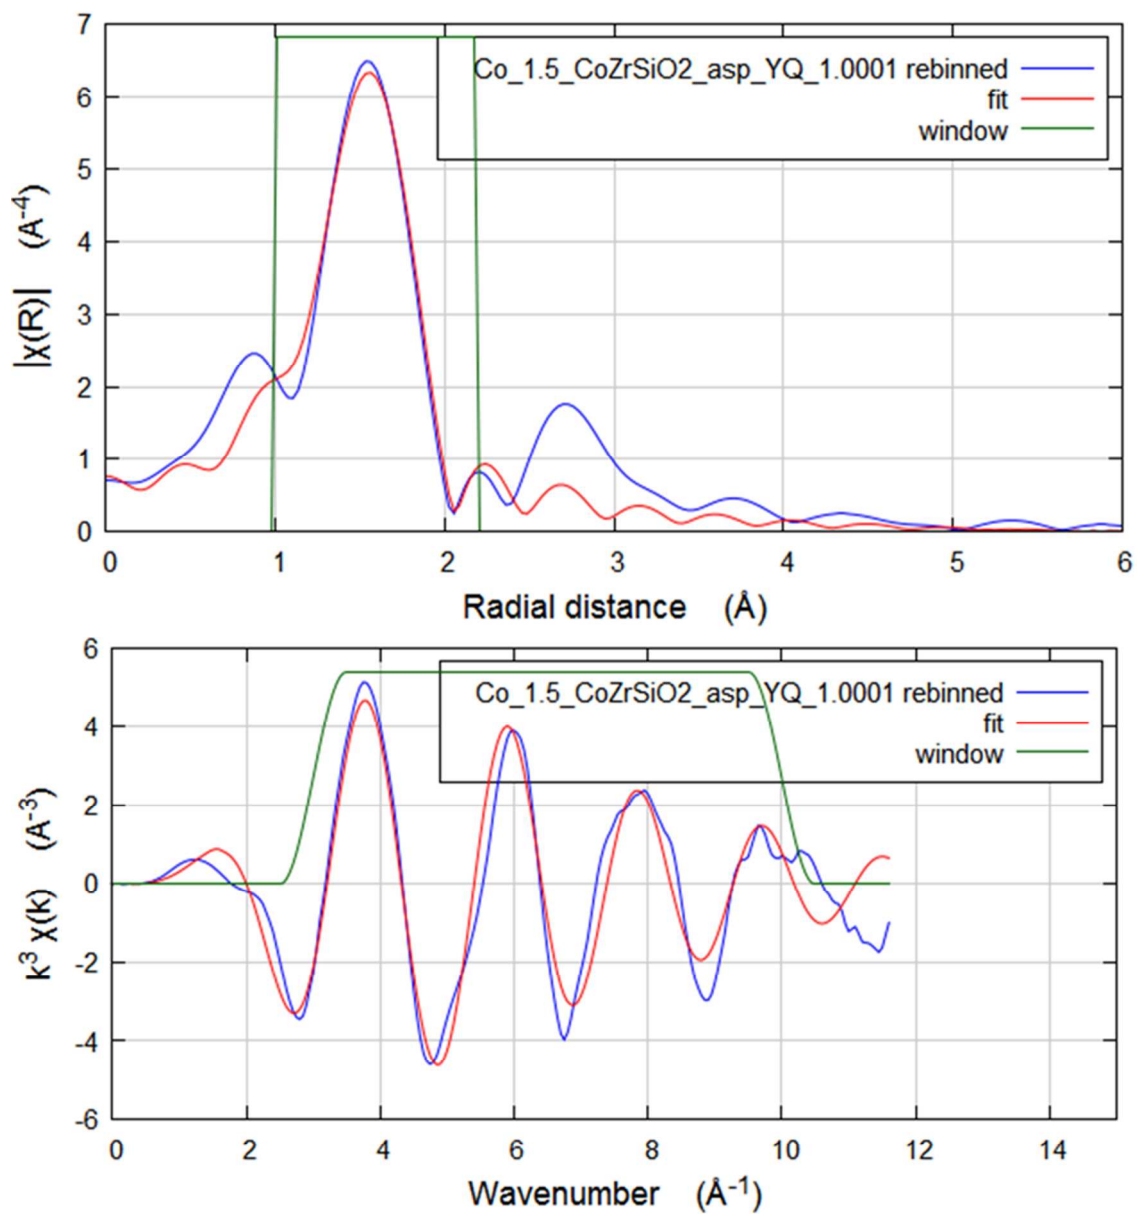

**Figure S5.** EXAFS data and fit for Co-Zr/SiO<sub>2</sub> as-prepared in (1)  $R$ -space (top) and (2)  $k$ -space (bottom).

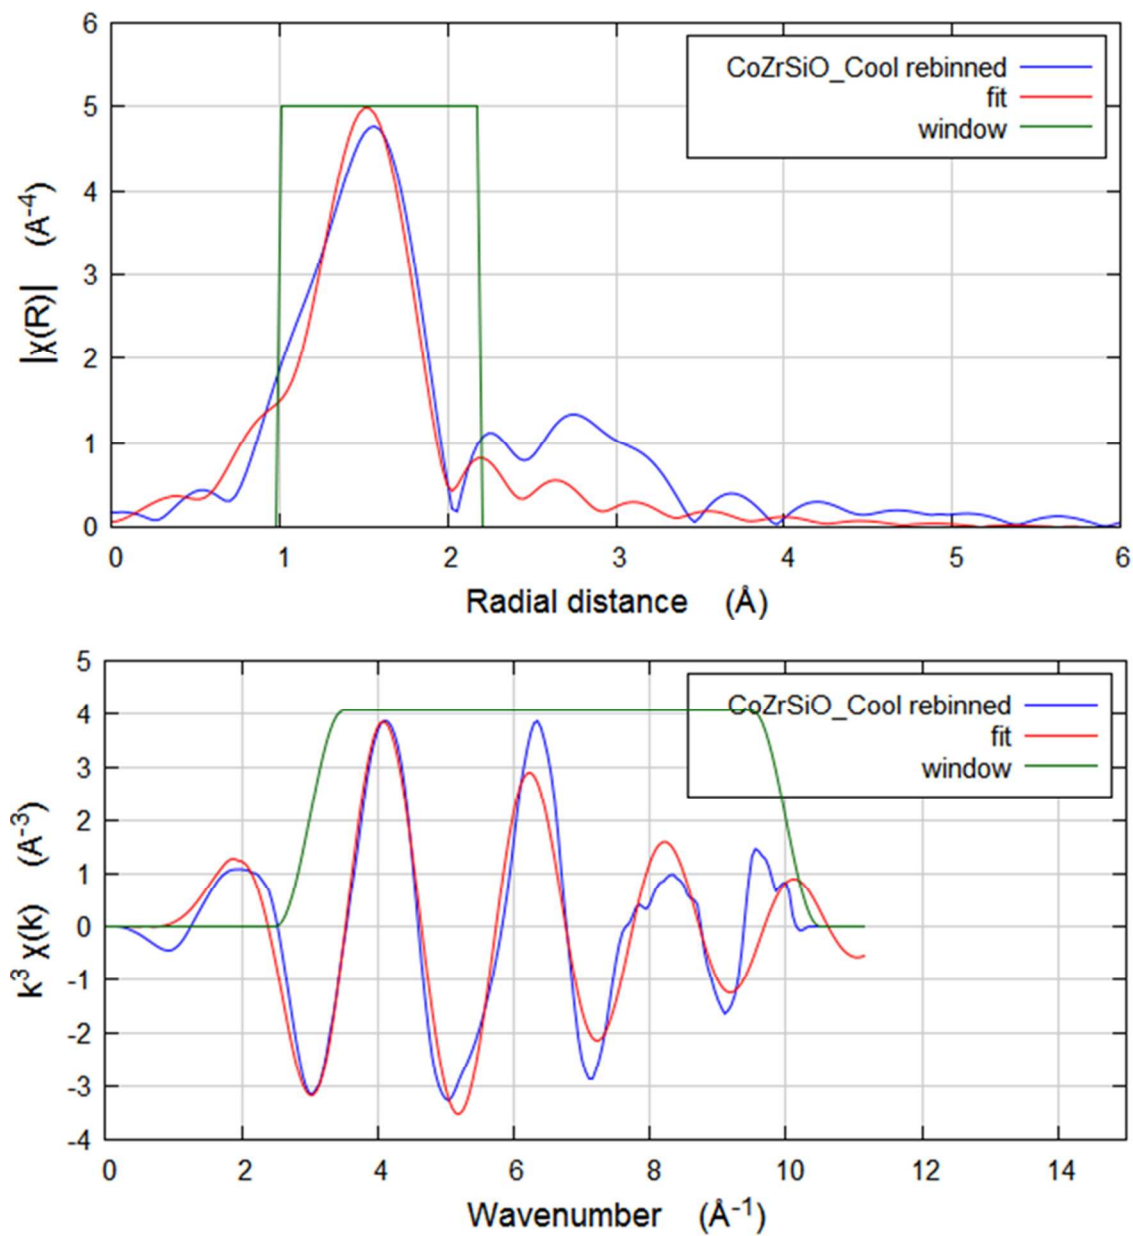

**Figure S6.** EXAFS data and fit for Co-Zr/SiO<sub>2</sub> cooled down to room temperature after catalysis in (1)  $R$ -space (top) and (2)  $k$ -space (bottom).

## Synthesis of Co/ZrO<sub>2</sub> catalyst

Cobalt was grafted onto ZrO<sub>2</sub> via incipient wetness impregnation (IWI) using Co(NH<sub>3</sub>)<sub>6</sub>Cl<sub>3</sub>. ZrO<sub>2</sub> was dried at 200 °C for 4h to establish a reproducible weight and hydration level. 0.1362g Co(NH<sub>3</sub>)<sub>6</sub>Cl<sub>3</sub> was dissolved in to 1mL of DI water, then Co(NH<sub>3</sub>)<sub>6</sub>Cl<sub>3</sub> solution was dropped on ZrO<sub>2</sub> (2.0 g) and dried at 120 °C for 2h Then the sample was calcined in air to 300 °C for 4h and resulting cobalt loading was 1.5%.

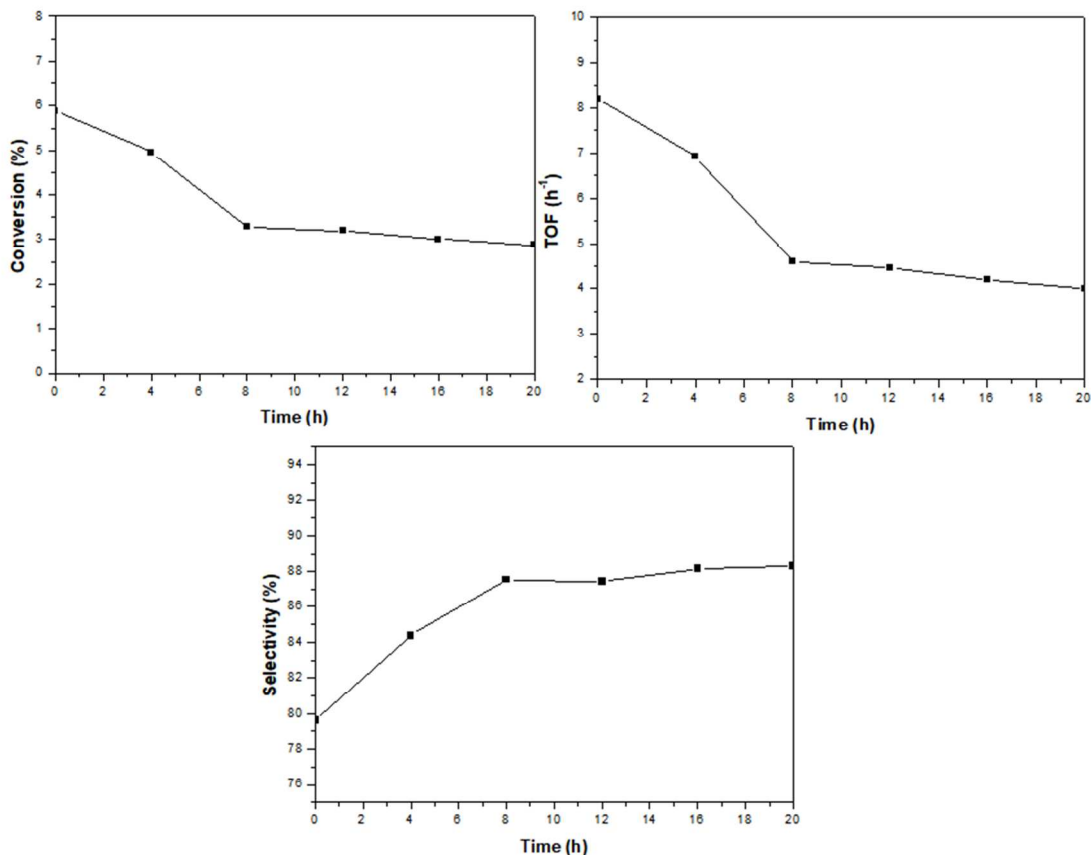

**Figure S7.** Propane dehydrogenation reactivity and selectivity performed at 550 °C, propane (3% in argon) flow rate is 20 mL/min, using Co/ZrO<sub>2</sub> catalyst.
